# Supplementary material for: EREG is the core onco-immunological biomarker of cuproptosis and mediates the cross-talk between VEGF and CD99 signaling in glioblastoma
Source: Springer Nature journal article supplement (doi:10.1186/s12967-023-03883-4), 2023-01-16

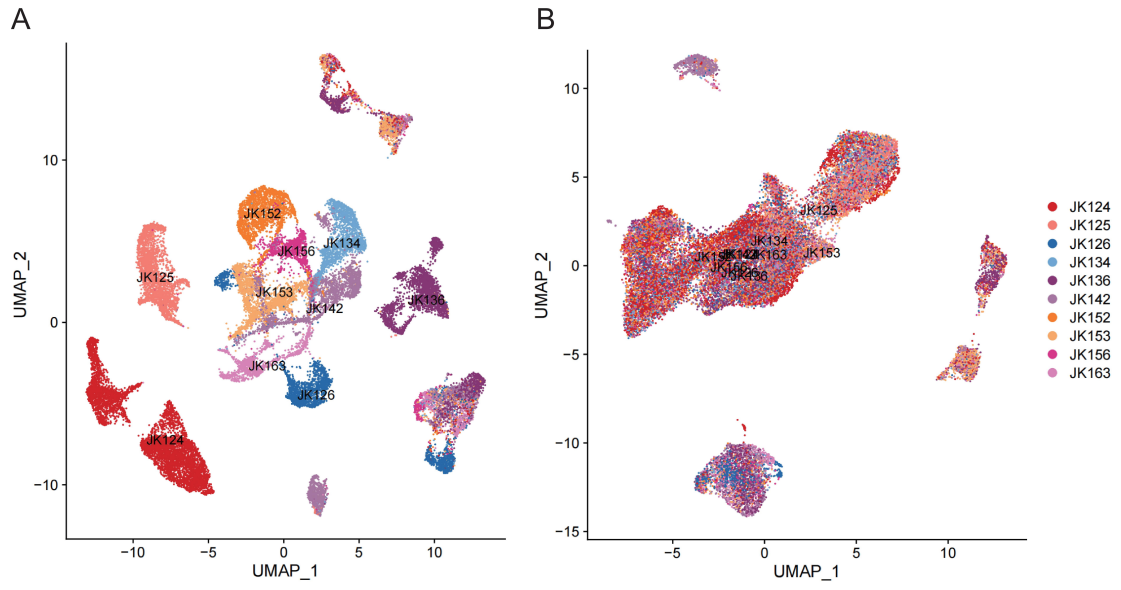

Figure S1. Batch Effect (A) and Batch Correction (B) for Single-Cell Data.

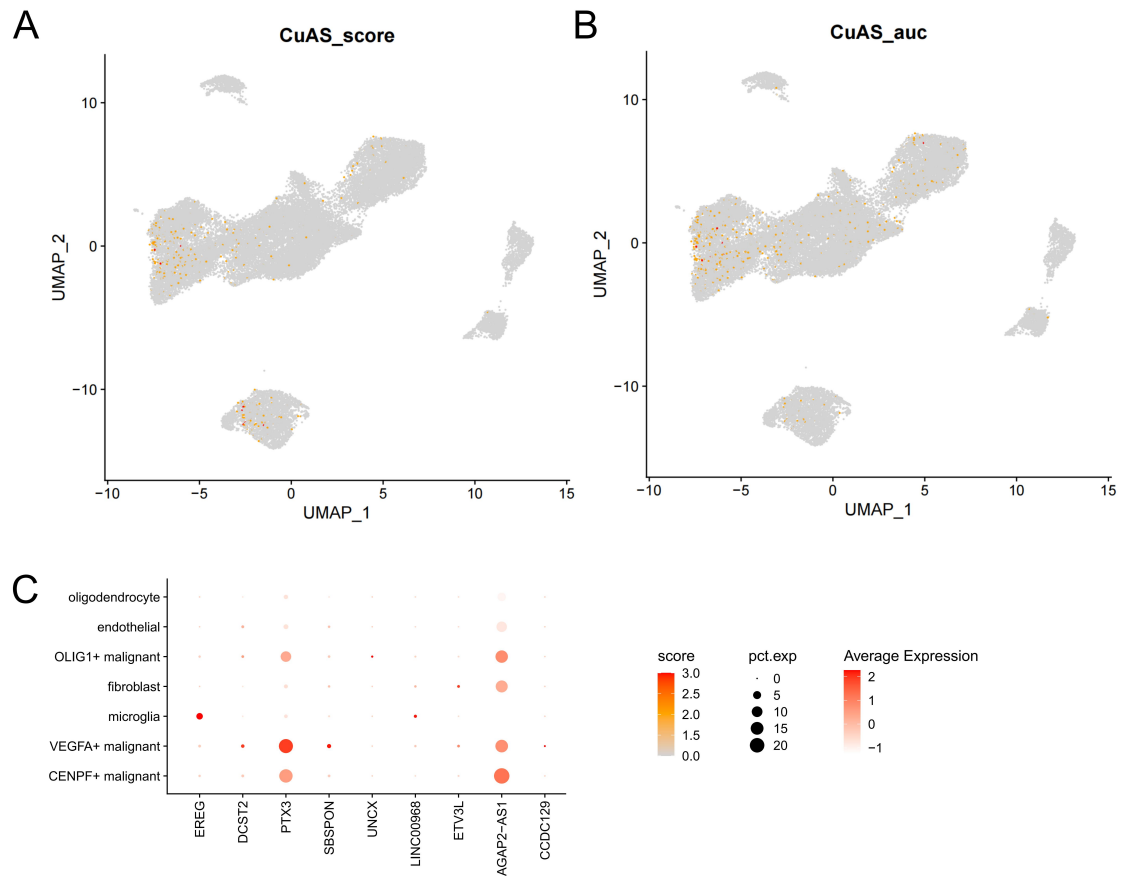

Figure S2. Distribution of copper death score in single cell data. (A) Calculate CuAS based on the same method as before; (B) Calculate CuAS based on AUCCell method; (C) Expression distribution of the detected characteristic genes in each cell type.

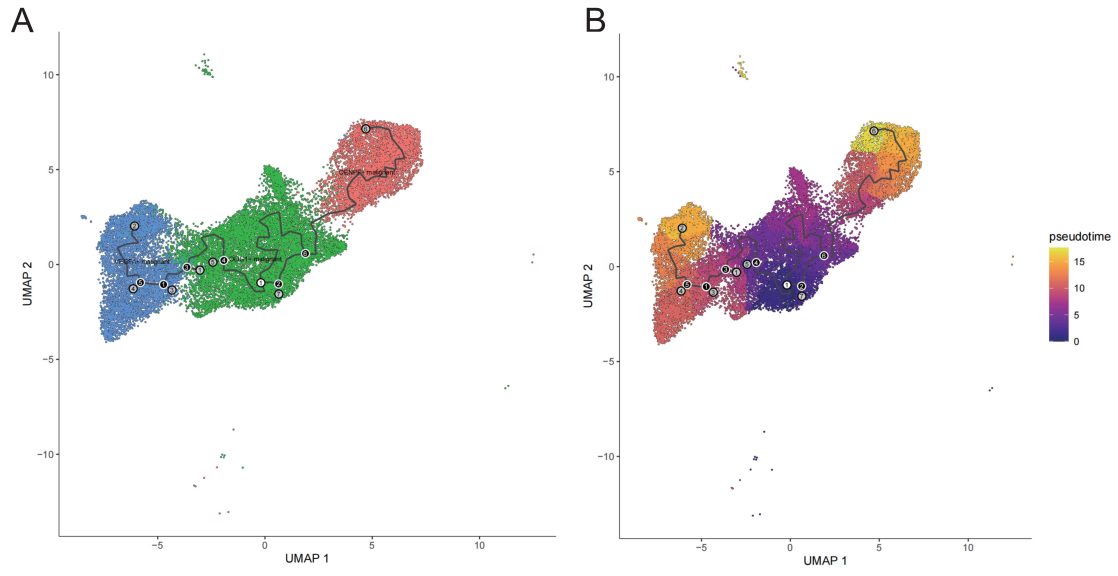

Figure S3. Trajectory inference of tumor cells were depicted by UMAP.

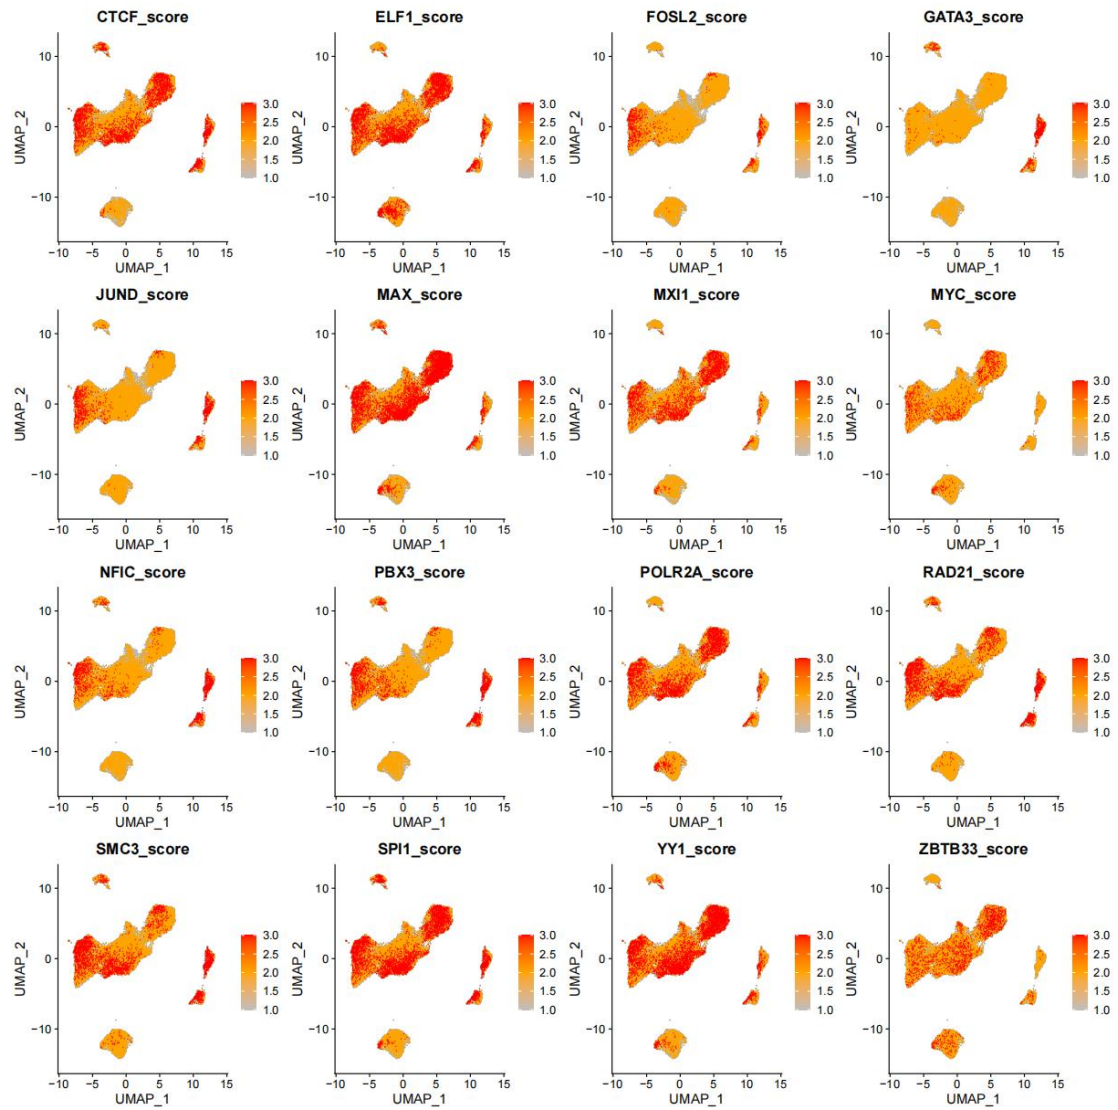

Figure S4. Based on the TF-target information of hTFtarget database, the activity of 16 TFS in each cell was calculated.



Figure S6. Prognostic efficacy of CuAS score on overall survival and progression-free survival in an immunotherapy cohort. (A) GSE131521. (B) phs001493. (C) IMvigor210. (D) PRJEB23709\_ipiPD1. (E) NCT02684006. The unit of survival time is month. Patients were divided into groups based on CuAS score and maximum unified measurement.

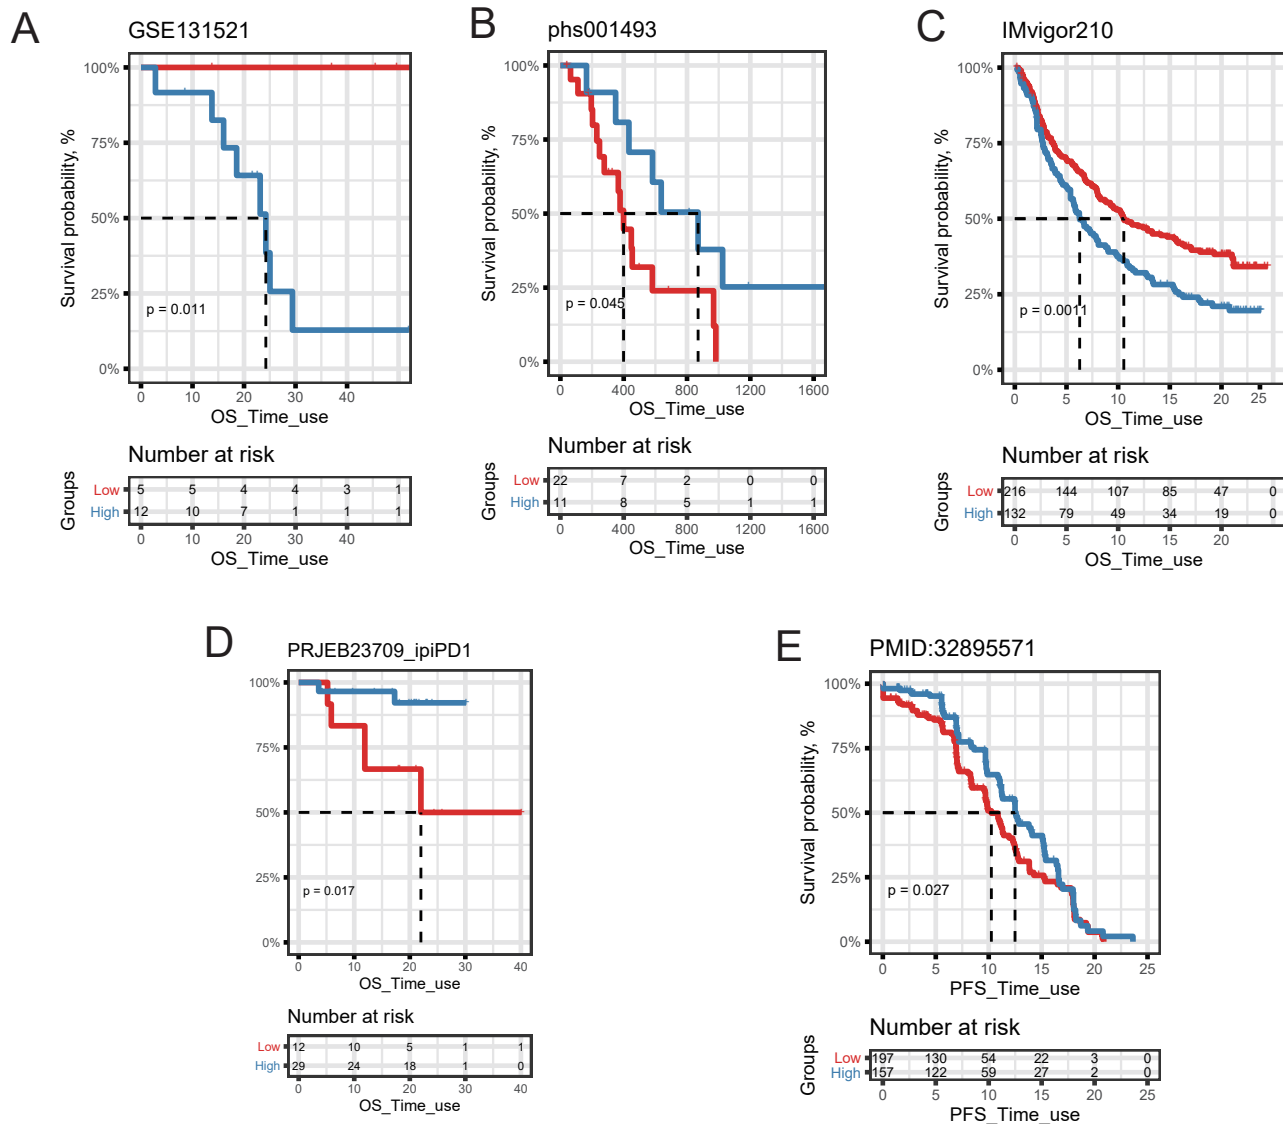

Supplement: MOESM2 [file 23925860]
